# Supplementary material
Source: PubMed Central journal article supplement (PMC4243846)

## Supplementary Material

**Table S1: Baseline Characteristics of Waitlist Patients, by Racial Group**

| <b>Variable</b>            | <b>White<br/>(n=5048)</b> | <b>Black<br/>(n=1518)</b> | <b>Hispanic<br/>(n=1080)</b> | <b>Other<br/>(n=450)</b> | <b>Total<br/>(n=8096)</b> | <b>P Value</b> |
|----------------------------|---------------------------|---------------------------|------------------------------|--------------------------|---------------------------|----------------|
| <b>Age, yr</b>             | 1 [0,11]                  | 4 [0,13]                  | 1 [0,9]                      | 3 [0,12]                 | 2 [0,11]                  | <0.001         |
| <b>Age categories (yr)</b> |                           |                           |                              |                          |                           | <0.001         |
| <1                         | 2177 (43)                 | 483 (32)                  | 492 (46)                     | 149 (33)                 | 3301 (41)                 |                |
| 1-5                        | 998 (20)                  | 343 (23)                  | 237 (22)                     | 118 (26)                 | 1696 (21)                 |                |
| 6-11                       | 715 (14)                  | 234 (15)                  | 149 (14)                     | 67 (15)                  | 1165 (14)                 |                |
| 12-17                      | 1158 (23)                 | 458 (30)                  | 202 (19)                     | 116 (26)                 | 1934 (24)                 |                |
| <b>Female Gender</b>       | 2080 (41)                 | 716 (47)                  | 468 (43)                     | 224 (50)                 | 3488 (43)                 | <0.001         |
| <b>Diagnosis</b>           |                           |                           |                              |                          |                           | <0.001         |
| Cardiomyopathy             | 1553 (31)                 | 629 (41)                  | 402 (37)                     | 207 (46)                 | 2791 (34)                 |                |
| CHD                        | 2494 (49)                 | 552 (36)                  | 535 (50)                     | 151 (34)                 | 3732 (46)                 |                |
| Other                      | 1001 (20)                 | 337 (22)                  | 143 (13)                     | 92 (20)                  | 1573 (19)                 |                |
| <b>Listing Status</b>      |                           |                           |                              |                          |                           | <0.001         |
| 1 or 1A                    | 3317 (66)                 | 998 (66)                  | 703 (65)                     | 308 (68)                 | 5326 (66)                 |                |
| 1B                         | 301 (6)                   | 122 (8)                   | 102 (9)                      | 43 (10)                  | 568 (7)                   |                |
| 2                          | 1430 (28)                 | 398 (26)                  | 275 (25)                     | 99 (22)                  | 2202 (27)                 |                |
| <b>Type of Support</b>     |                           |                           |                              |                          |                           | <0.001         |
| ECMO                       | 429 (9)                   | 127 (8)                   | 76 (7)                       | 34 (8)                   | 666 (8)                   |                |
| Ventilator                 | 794 (16)                  | 223 (15)                  | 201 (19)                     | 71 (16)                  | 1289 (16)                 |                |
| Inotropes                  | 920 (18)                  | 407 (27)                  | 257 (24)                     | 121 (27)                 | 1705 (21)                 |                |
| None of above              | 2905 (58)                 | 761 (50)                  | 546 (51)                     | 224 (50)                 | 4436 (55)                 |                |
| <b>VAD</b>                 | 138 (3)                   | 63 (4)                    | 41 (4)                       | 22 (5)                   | 264 (3)                   | 0.005          |
| <b>Blood Type</b>          |                           |                           |                              |                          |                           | <0.001         |
| O                          | 2287 (45)                 | 781 (51)                  | 641 (59)                     | 188 (42)                 | 3897 (48)                 |                |
| A                          | 2089 (41)                 | 409 (27)                  | 304 (28)                     | 142 (32)                 | 2944 (36)                 |                |
| B                          | 483 (10)                  | 271 (18)                  | 109 (10)                     | 87 (19)                  | 950 (12)                  |                |
| AB                         | 189 (4)                   | 57 (4)                    | 26 (2)                       | 33 (7)                   | 305 (4)                   |                |

|                              |           |          |          |          |           |        |
|------------------------------|-----------|----------|----------|----------|-----------|--------|
| <b>Dialysis</b>              | 61 (1)    | 22 (1)   | 16 (1)   | 5 (1)    | 104 (1)   | 0.80   |
| <b>Prior Cardiac Surgery</b> | 826 (16)  | 243 (16) | 234 (22) | 61 (14)  | 1364 (17) | <0.001 |
| <b>Medicaid Insurance</b>    | 1050 (21) | 755 (50) | 566 (52) | 114 (25) | 2485 (31) | <0.001 |
| <b>Era of Transplant</b>     |           |          |          |          |           | <0.001 |
| 1989-1994                    | 1477 (29) | 337 (22) | 164 (15) | 100 (22) | 2078 (26) |        |
| 1995-1999                    | 1324 (26) | 350 (23) | 227 (21) | 81 (18)  | 1982 (24) |        |
| 2000-2004                    | 1196 (24) | 386 (25) | 337 (31) | 138 (31) | 2057 (25) |        |
| 2005-2009                    | 1051 (21) | 445 (29) | 352 (33) | 131 (29) | 1979 (24) |        |

Values are summarized as number (percent) or median (25<sup>th</sup>, 75<sup>th</sup> percentile). Yr (year), CHD (congenital heart disease), ECMO (extra-corporeal membrane oxygenation), VAD (ventricular assist device),

**Figure S1: Black and Hispanic children expressed as a percentage of US pediatric population and as a percentage of US children listed for HT. The increase in percentage of minority children listed for HT is disproportionate to that expected by change in US demographics.**

**Black**

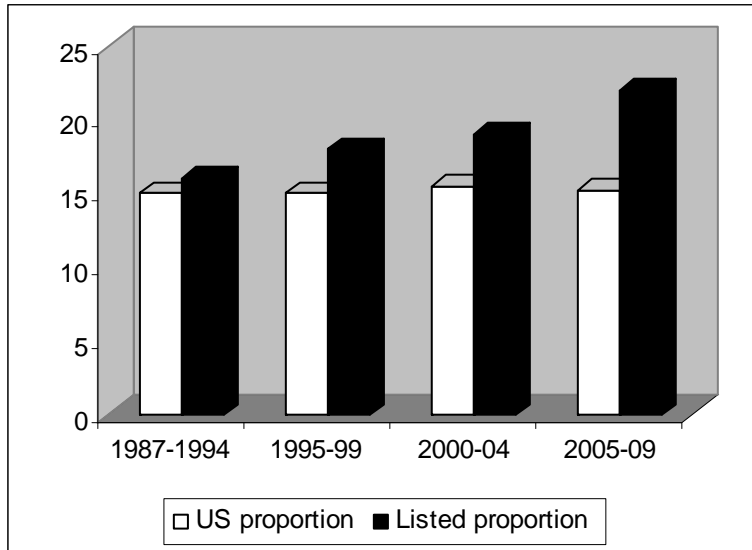

**Hispanic**

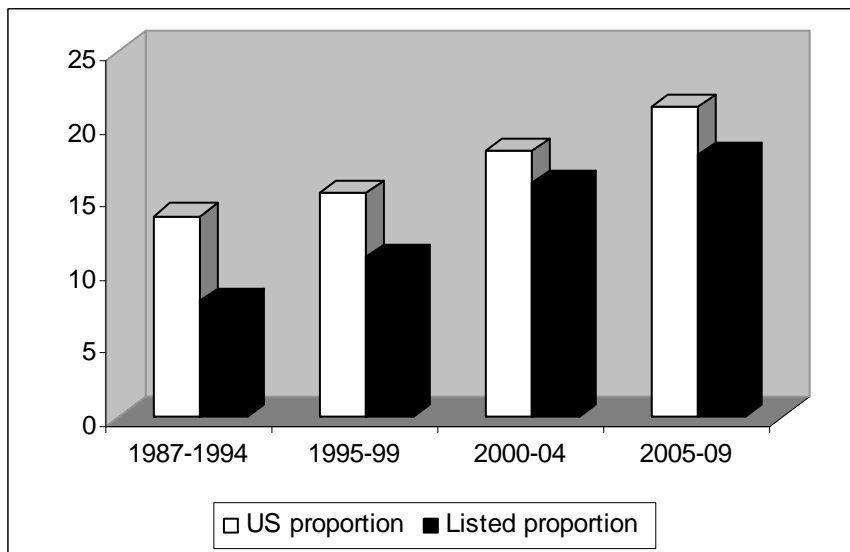

Supplement: NIHMS643448-supplement-Supplemental_Data.pdf [file NIHMS643448-supplement-Supplemental_Data.pdf]
